# Supplementary material for: Scalable, hydrophobic and highly-stretchable poly(isocyanurate–urethane) aerogels
Source: Royal Society of Chemistry journal article supplement (doi:10.1039/c8ra03085e), 2018-01-01
Supplement: c8ra03085e2.pdf [file c8ra03085e2.pdf]

## Supporting Information

### Scalable, Hydrophobic and Highly-Stretchable Poly(isocyanurate-urethane) Aerogels

Sadeq Malakooti<sup>1</sup>, Saman Rostami<sup>1</sup>, Habel Gitogo Churu<sup>2</sup>, Huiyang Luo<sup>1</sup>, Jenna Clark<sup>1,†</sup>, Fabiola Casarez<sup>1,†</sup>, Owen Rettenmaier<sup>1,†</sup>, Soheil Daryadel<sup>1</sup>, Majid Minary-Jolandan<sup>1</sup>, Chariklia Sotiriou-Leventis<sup>3</sup>, Nicholas Leventis<sup>3</sup> and Hongbing Lu<sup>1,\*</sup>

<sup>1</sup>Department of Mechanical Engineering, The University of Texas at Dallas,  
Richardson, TX 75080, USA

<sup>2</sup>Department of Mechanical Engineering, LeTourneau University,  
Longview, TX 75602, USA

<sup>3</sup>Department of Chemistry, Missouri University of Science and Technology,  
Rolla, MO 65409, USA

<sup>†</sup>NSF Research Experience for Undergraduate (REU) Fellow

\*Corresponding author. Email: hongbing.lu@utdallas.edu; Phone: (972) 883 4647

### Content

Appendix I: Formulations and gelation times of PU aerogels

Appendix II: SEM images of PU aerogels

Appendix III: The effect of hexylamine concentration on the static water drop contact angle with the aerogel surface

Appendix IV: TGA and DSC data of PU aerogels

Appendix V: SHPB data of PU aerogels

Movie S1: The typical real-time DIC measurement demonstration of the instantaneous strain fields during the quasi-static uniaxial test of the PU aerogel at 0.28 g/cm<sup>3</sup> to measure the Poisson's ratio.

## Appendix I: Formulations and gelation times of PU aerogels

Table S.1: Formulations and gelation times of PU aerogels

| Sample | N3300A   |      | TEG      |      | DBDTL       |       | CH <sub>3</sub> CN (ml) | Gelation time (min) |
|--------|----------|------|----------|------|-------------|-------|-------------------------|---------------------|
|        | Mass (g) | mmol | Mass (g) | mmol | Volume (ml) | mmol  |                         |                     |
| PU1    | 14.732   | 30   | 6.758    | 45   | 0.805       | 1.364 | 162.369                 | 120                 |
| PU2    | 14.732   | 30   | 6.758    | 45   | 0.732       | 1.240 | 160.749                 | 106                 |
| PU3    | 14.732   | 30   | 6.758    | 45   | 0.486       | 0.824 | 159.489                 | 93                  |
| PU4    | 14.732   | 30   | 6.758    | 45   | 0.467       | 0.792 | 156.429                 | 90                  |

Density information provided by the suppliers: N3300A (1.17 g/cm<sup>3</sup>), TEG (1.10 g/cm<sup>3</sup>), CH<sub>3</sub>CN (0.79 g/cm<sup>3</sup>) and DBDTL (1.07 g/cm<sup>3</sup>).

## Appendix II: SEM images of PU aerogels

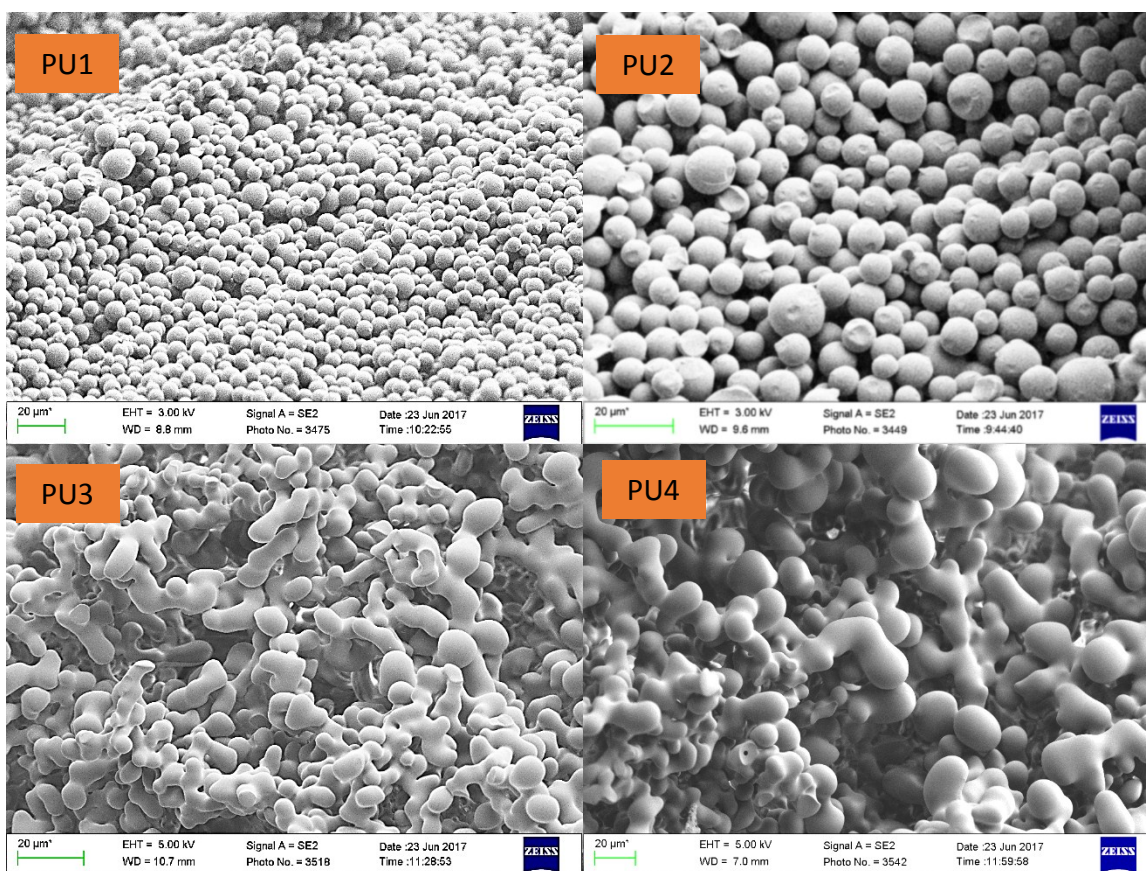

Figure S.1: The SEM images of PU aerogels

**Appendix III: The effect of hexylamine concentration on the static water drop contact angle with the aerogel surface**

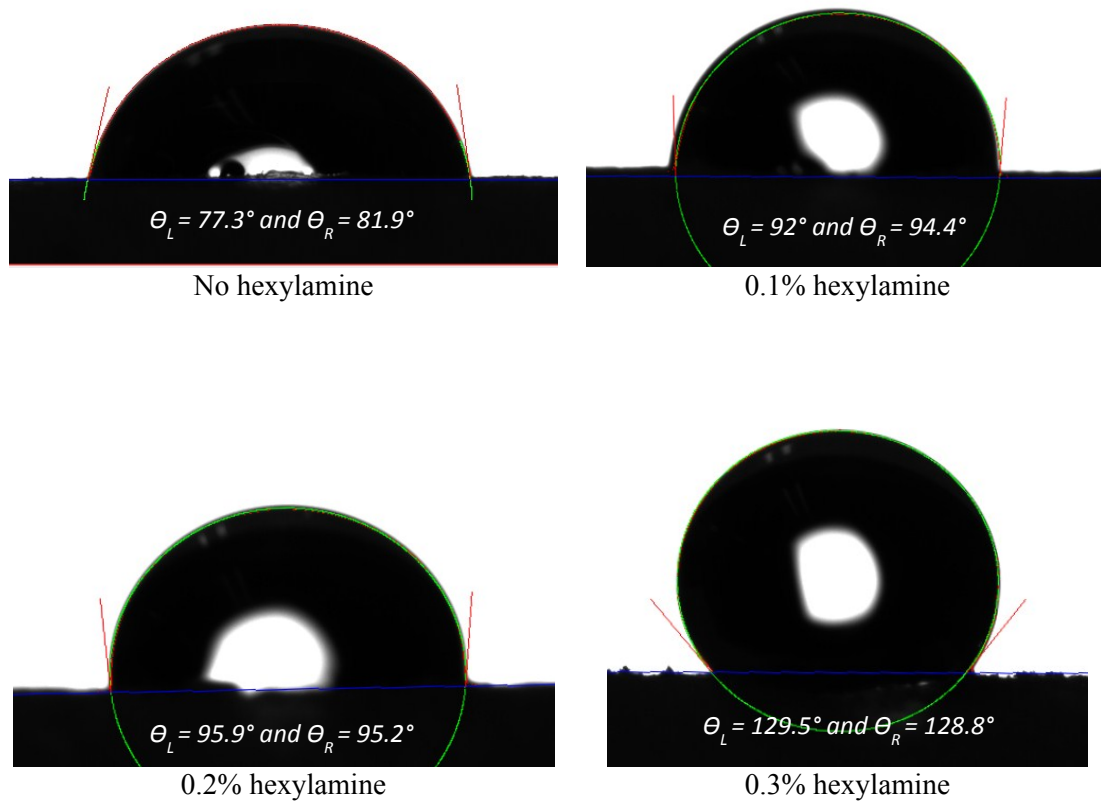

Figure S.2: The static water drop contact angles with the aerogel surface at different hexylamine concentrations

## Appendix IV: TGA and DSC data of PU aerogels

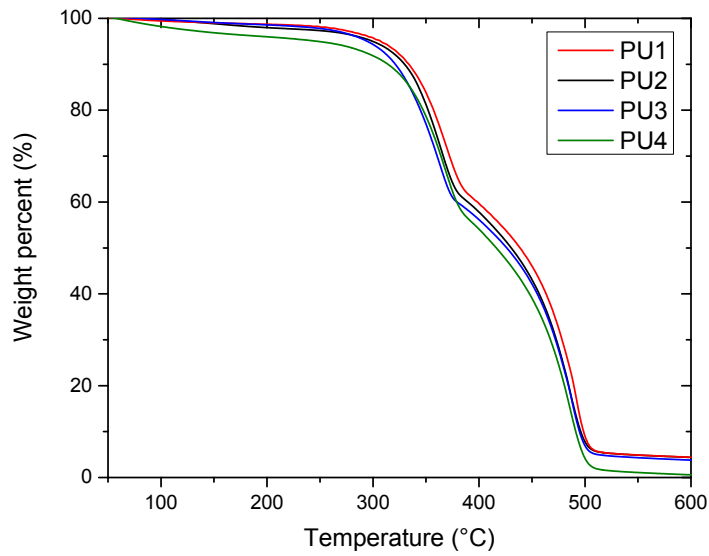

Figure S.3: TGA analysis of PU aerogels

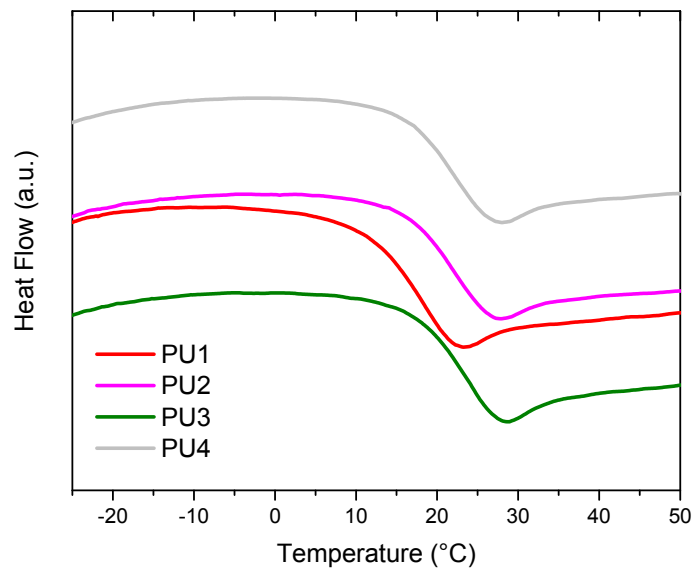

Figure S.4: DSC data of PU aerogels

## Appendix V: SHPB data of PU aerogels

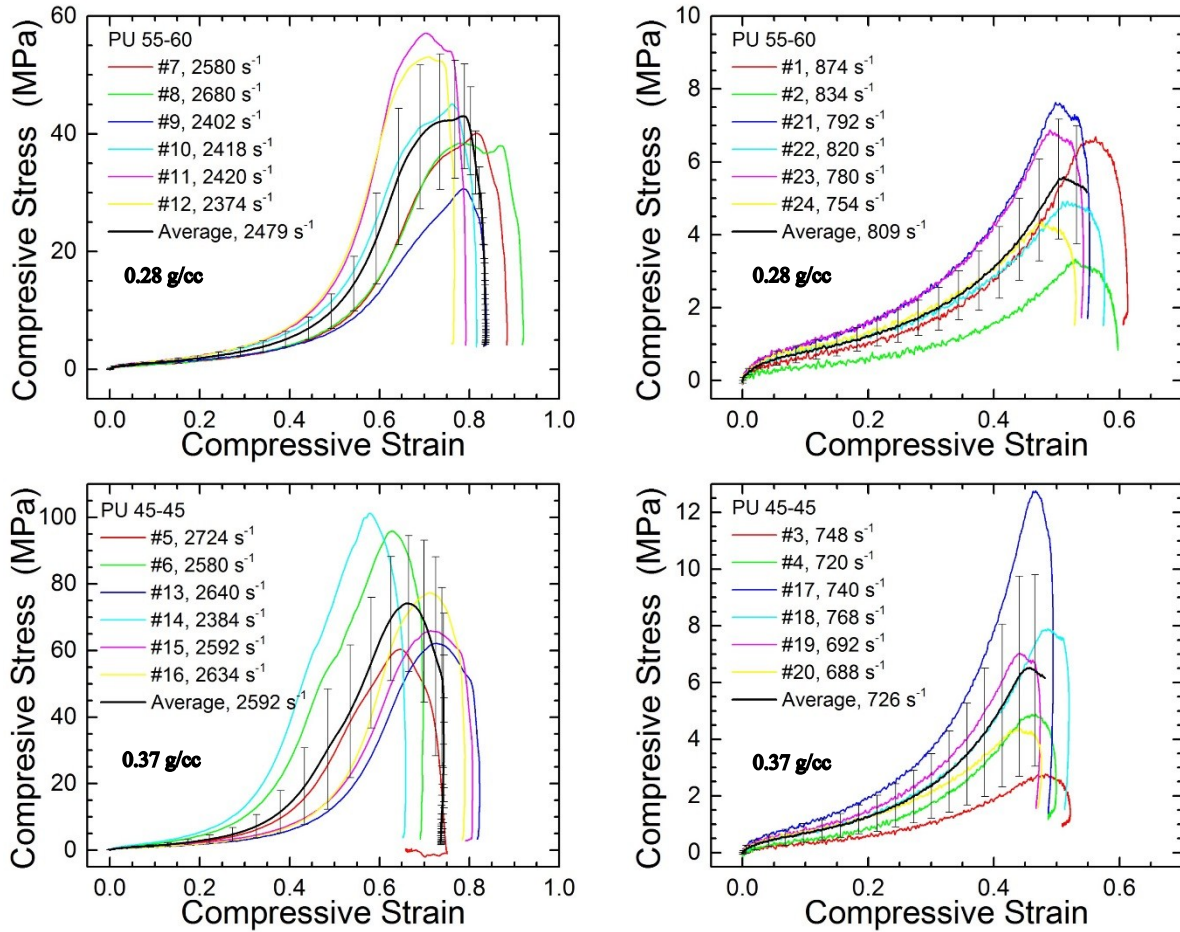

Figure S.5: SHPB data of PU aerogels (PU 55-60 at 0.28 g/cc and PU 45-45 at 0.37 g/cc)
